# Supplementary material for: Prediction of Function Determining and Buried Residues Through Analysis of Saturation Mutagenesis Datasets
Source: Front Mol Biosci. 2021 Mar 11;8:635425. doi: 10.3389/fmolb.2021.635425 (PMC7991590; doi:10.3389/fmolb.2021.635425)
Supplement: Supplementary file 4 [file datasheet3.xlsx]

## Sheet: Active-site
Table S3. Active-site prediction based on the mutational sensitivity data and predicted sequence-based accessibility values using NetSurfP or SPIDER3.
Protein		Sensitivity		Specificity		Accuracy		Matthews Correlation Coefficient
		NetSurfP	SPIDER3	NetSurfP	SPIDER3	NetSurfP	SPIDER3	NetSurfP	SPIDER3
Aminoglycoside kinase	KKA2	54.5	81.8	86.9	88.5	85.6	88.2	0.23	0.4
BRCA1 RING domain - BARD1 binding	BRCA1 (RING)(Y2H)	36.4	54.5	88.6	87.1	81.5	82.7	0.24	0.37
BRCA1 RING domain - E3 ligase activity	BRCA1 (RING)(E3)	20	30	84.6	86.2	76	78.7	0.04	0.15
CcdB	CcdB	62.5	62.5	89.7	89.7	87.5	87.5	0.41	0.41
Gal4 (DBD)	Gal4 (DBD)	33.3	46.6	86	97.7	72.4	84.5	0.22	0.56
GB1 (IgG binding domain)	Protein G (GB1)	71.4	71.4	93.6	93.6	90.7	90.7	0.62	0.62
Hsp90 (ATPase domain)	HSP90	80	66.7	91	87	90.2	85.6	0.52	0.37
NUDT15	NUDT15	36.4	31.8	91.2	82.4	83.5	75.3	0.29	0.12
Pab1 (RRM domain)	PAB1 (RRM)	50	62.5	89.4	90.9	85.1	87.8	0.34	0.47
PSD (pdz3 domain)	PSD95 (pdz3)	50	50	89.3	88	85.5	84.3	0.33	0.31
TEM1 β- lactamase	TEM-1	44.4	44.4	84.6	85	83.3	83.7	0.14	0.15
Ubiquitin	Ubiquitin	55.6	55.6	94.6	98.2	89.2	92.3	0.53	0.64
