# Supplementary material for: Prediction of Function Determining and Buried Residues Through Analysis of Saturation Mutagenesis Datasets
Source: Front Mol Biosci. 2021 Mar 11;8:635425. doi: 10.3389/fmolb.2021.635425 (PMC7991590; doi:10.3389/fmolb.2021.635425)
Supplement: Supplementary file 5 [file datasheet4.xlsx]

## Sheet: Buried
Table S4. Prediction of buried sites based on mutational sensitivity data and predicted sequence-based accessibility values using NetSurfP or SPIDER3.
Protein		Sensitivity		Specificity		Accuracy		Matthews Correlation Coefficient
		NetSurfP	SPIDER3	NetSurfP	SPIDER3	NetSurfP	SPIDER3	NetSurfP	SPIDER3
Aminoglycoside kinase	KKA2	68.9	68.9	91.7	90.3	86.7	83.6	0.61	0.58
BRCA1 RING domain - BARD1 binding	BRCA1 (RING)(Y2H)	23.1	23.1	89.7	83.8	79	74.1	0.14	0.1
BRCA1 RING domain - E3 ligase activity	BRCA1 (RING)(E3)	38.5	53.8	80.6	87.1	73.3	81.3	0.17	0.39
CcdB	CcdB	68.4	63.2	94.8	94.8	89.6	88.5	0.66	0.62
Gal4 (DBD)	Gal4 (DBD)	50	100	82.1	78.6	81	79.3	0.15	0.34
GB1 (IgG binding domain)	Protein G (GB1)	60	60	90.9	93.2	85.2	87	0.51	0.55
Hsp90 (ATPase domain)	HSP90	21.9	21.9	84.2	84.2	74.9	74.9	0.06	0.06
NUDT15	NUDT15	69.6	72.2	84	86.4	81	83.5	0.49	0.55
Pab1 (RRM domain)	PAB1 (RRM)	78.5	78.6	90	91.7	87.8	89.2	0.64	0.66
PSD (pdz3 domain)	PSD95 (pdz3)	40	45	87.3	87.3	75.9	77.1	0.3	0.34
TEM1 β- lactamase	TEM-1	48.3	55.2	89.7	92	76	79.8	0.43	0.52
Ubiquitin	Ubiquitin	36.4	36.4	83.3	83.3	75.4	75.4	0.18	0.18
