# Supplementary material for: Prediction of Function Determining and Buried Residues Through Analysis of Saturation Mutagenesis Datasets
Source: Front Mol Biosci. 2021 Mar 11;8:635425. doi: 10.3389/fmolb.2021.635425 (PMC7991590; doi:10.3389/fmolb.2021.635425)
Supplement: Supplementary file 7 [file datasheet6.xlsx]

## Sheet: Sheet1
Table S6. Prediction of active-site, buried and exposed non active-site residues using SNAP2 predicted mutational effect scores combined with predicted accessibility results from PROF.
Protein	Sensitivity			Specificity			Accuracy			Matthews Correlation Coefficient
	Active-site	Buried	Exposed non active-site	Active-site	Buried	Exposed non active-site	Active-site	Buried	Exposed non active-site	Active-site	Buried	Exposed non active-site
Aminoglycoside kinase	27.3	37.8	88.8	84.1	86.2	30.8	78.8	71.6	70.8	0.06	0.21	0.23
BRCA1 RING domain - BARD1 binding	27.3	46.1	91.2	92.8	80.8	20.8	83.9	75.3	70.4	0.23	0.23	0.17
CcdB	37.5	68.4	81.2	84.1	87	14.8	80.2	83.3	62.5	0.16	0.52	-0.04
Gal4 (DBD)	40	50	87.8	88.4	82.1	35.3	75.8	81	72.4	0.32	0.15	0.27
GB1 (IgG binding domain)	0	60	78.4	82.9	93.2	0	72.2	87	53.7	-0.16	0.55	-0.28
Hsp90 (ATPase domain)	66.7	12.5	90.5	89.5	84.2	31.9	87.9	73.5	77.7	0.41	-0.03	0.26
NUDT15	36.4	42.4	89.6	88.8	82.9	24.2	81.4	74.4	63.9	0.25	0.25	0.18
Pab1 (RRM domain)	25	76.9	82.7	84.8	90.2	0.1	78.3	87.8	60.8	0.08	0.62	-0.1
PSD (pdz3 domain)	62.5	60	81.8	83.3	93.6	21.4	83.1	85.5	61.4	0.36	0.58	0.04
TEM1 β- lactamase	22.2	39.1	81	82.3	90.3	14	80.2	73.4	55.5	0.02	0.35	-0.06
Ubiquitin	22.2	54.5	88.9	91.1	90.7	10	81.5	84.6	64.6	0.15	0.45	-0.01
